# Supplementary material
Source: publisher figshare collection journal article supplement (https://karger.figshare.com/ndownloader/files/26086322)
Supplement: Supplementary file 1 [file 26086322]

# Appendix

**Search strategy for PubMed for 30th of April, 2019**

| **Search** | **Query** | **Items found** |
| --- | --- | --- |
| **#7** | #6 NOT (animals[mh] NOT humans[mh]) | **1,047** |
| **#6** | (#1 OR #3) AND (#2 OR (#4 AND #5)) | **1,060** |
| **#5** | "Uterus"[Majr:NoExp] OR "Cervix Uteri"[Majr] OR "Endometrium"[Majr:NoExp] OR "Decidua"[Majr:NoExp] OR "Vagina"[Majr:NoExp] OR vagina*[ti] OR uterin*[ti] OR uterus[ti] OR vagina*[ti] OR endometri*[ti] OR cervix[ti] OR cervic*[ti] OR decidua*[ti] OR pseudodecidua*[ti] OR withdrawal[ti] OR vagina*[ot] OR uterin*[ot] OR uterus[ot] OR vagina*[ot] OR endometri*[ot] OR cervix[ot] OR cervic*[ot] OR decidua*[ot] OR pseudodecidua*[ot] OR withdrawal[ot] | **326,242** |
| **#4** | "Hemorrhage"[Majr:NoExp] OR bleeding*[ti] OR hemorrhag*[ti] OR haemorrhag*[ti] OR blood loss*[ti] OR shedding*[ti] OR genital cris*[ti] OR plug*[ti] OR spotting[ti] OR obstructi*[ti] OR bleeding*[ot] OR hemorrhag*[ot] OR haemorrhag*[ot] OR blood loss*[ot] OR shedding*[ot] OR genital cris*[ot] OR plug*[ot] OR spotting[ot] OR obstructi*[ot] | **283,480** |
| **#3** | mini puber*[tiab] OR minipuber*[tiab] OR pubertas precox[tiab] OR pubertas praecox[tiab] OR prepubert*[tiab] OR precoci*[tiab] OR proeoti*[tiab] OR proioti*[tiab] | **25,389** |
| **#2** | "Uterine Hemorrhage"[Majr:NoExp] OR "Menorrhagia"[Majr] OR "Hematocolpos"[Majr] OR "Hematometra"[Majr] OR "Menstrual Cycle"[Majr:NoExp] OR "Menstruation Disturbances"[Majr:NoExp] OR "Metrorrhagia"[Majr] OR "Menstruation"[Majr] OR hematocolp*[ti] OR haematocolp*[ti] OR hematometr*[ti] OR haematometr*[ti] OR menses[ti] OR metrorrhagi*[ti] OR menorrhagi*[ti] OR menstrua*[ti] OR menarch*[ti] OR hydrometrocolp*[ti] OR hydrohematometr*[ti] OR hydrohaematometr*[ti] OR hydrohematocolp*[ti] OR hydrohaematocolp*[ti] OR hematocolp*[ot] OR haematocolp*[ot] OR hematometr*[ot] OR haematometr*[ot] OR menses[ot] OR metrorrhagi*[ot] OR menorrhagi*[ot] OR menstrua*[ot] OR menarch*[ot] OR hydrometrocolp*[ot] OR hydrohematometr*[ot] OR hydrohaematometr* OR hydrohematocolp*[ot] OR hydrohaematocolp*[ot] | **33,109** |
| **#1** | "Infant, Newborn"[Mesh] OR neonat*[ti] OR newborn*[ti] OR preterm*[ti] OR prematur*[ti] OR serotin*[ti] OR dysmatur*[ti] OR postmatur*[ti] OR low birth weight[ti] OR neonat*[ot] OR newborn*[ot] OR preterm*[ot] OR prematur*[ot] OR serotin*[ot] OR dysmatur*[ot] OR postmatur*[ot] OR low birth weight[ot] | **669,667** |

**Search strategy for Embase.com (30 April 2019)**

| **Search** | **Query** | **Items found** |
| --- | --- | --- |
| **#12** | #10 NOT #11 | **941** |
| **#11** | #10 AND ('conference abstract'/it OR 'conference paper'/it) | **116** |
| **#10** | #9 NOT ([animals]/lim NOT [humans]/lim) | **1,057** |
| **#9** | #6 AND #8 | **1,082** |
| **#8** | #3 OR #7 | **47,966** |
| **#7** | #4 AND #5 | **13,213** |
| **#6** | #1 OR #2 | **394,503** |
| **#5** | 'bleeding'/exp/mj OR 'neonatal hemorrhage'/exp/mj OR 'shedding'/exp/mj OR 'plug'/exp/mj OR 'obstruction'/mj OR bleeding*:ti,kw OR hemorrhag*:ti,kw OR haemorrhag*:ti,kw OR 'blood loss*':ti,kw OR shedding*:ti,kw OR 'genital cris*':ti,kw OR plug*:ti,kw OR spotting:ti,kw OR obstructi*:ti,kw | **502,293** |
| **#4** | 'uterus'/exp/mj OR 'vagina'/exp/mj OR uterin*:ti,kw OR uterus:ti,kw OR vagina*:ti,kw OR endometri*:ti,kw OR cervix:ti,kw OR cervic*:ti,kw OR decidua*:ti,kw OR pseudodecidua*:ti,kw OR withdrawal:ti,kw | **421,366** |
| **#3** | 'genital bleeding'/exp/mj OR 'menstrual cycle'/mj OR 'menstruation'/exp/mj OR 'uterine bleeding pattern'/exp/mj OR 'menstruation disorder'/mj OR 'menarche'/exp/mj OR 'hydrometrocolpos'/exp/mj OR hematocolp*:ti,kw OR haematocolp*:ti,kw OR hematometr*:ti,kw OR haematometr*:ti,kw OR menses:ti,kw OR metrorrhagi*:ti,kw OR menorrhagi*:ti,kw OR menstrua*:ti,kw OR menarch*:ti,kw OR hydrometrocolp*:ti,kw OR hydrohematometr*:ti,kw OR hydrohaematometr*:ti,kw OR hydrohematocolp*:ti,kw OR hydrohaematocolp*:ti,kw | **40,981** |
| **#2** | 'prepuberty'/exp OR 'precocious puberty'/exp OR 'mini puber*':ti,ab,kw OR minipuber*:ti,ab,kw OR 'pubertas precox':ti,ab,kw OR 'pubertas praecox':ti,ab,kw OR prepubert*:ti,ab,kw OR precoci*:ti,ab,kw OR proeoti*:ti,ab,kw OR proioti*:ti,ab,kw | **36,273** |
| **#1** | 'newborn'/exp/mj OR 'low birth weight'/exp/mj OR 'immature and premature labor'/exp/mj OR 'postmaturity'/exp/mj OR 'dysmaturity'/exp/mj OR neonat*:ti,kw OR newborn*:ti,kw OR preterm*:ti,kw OR prematur*:ti,kw OR serotin*:ti,kw OR dysmatur*:ti,kw OR postmatur*:ti,kw OR 'low birth weight':ti,kw | **359,929** |
